# Supplementary material for: Medicinal cannabis for symptom control in advanced cancer: a double-blind, placebo-controlled, randomised clinical trial of 1:1 tetrahydrocannabinol and cannabidiol
Source: Springer Nature journal article supplement (doi:10.1007/s00520-025-09763-5), 2025-07-24

Total OME (mg/24hr) at day 14

2000  
1500  
1000  
500  
0

THC/CBD:  $\rho = 0.01$ ,  $p = 0.91$

Placebo:  $\rho = -0.19$ ,  $p = 0.13$

1

2

3

Maximum dose of oil (ml)

Group    ● Placebo    ● THC.CBD

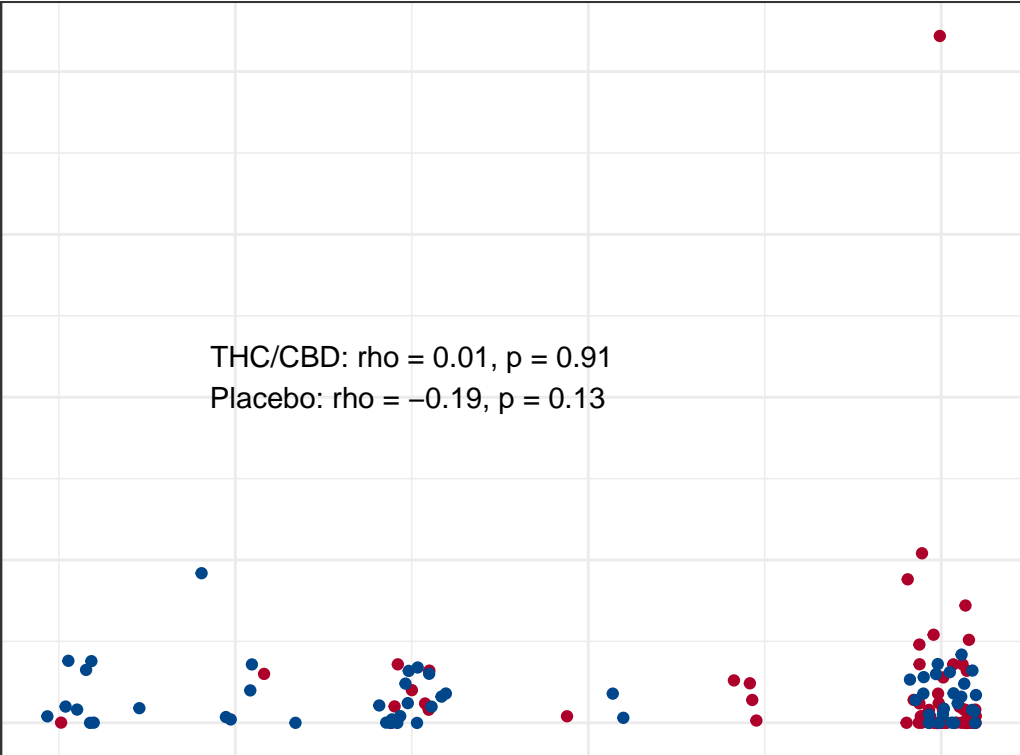

Supplement: MOESM7 [file 520_2025_9763_MOESM7_ESM-1.pdf]
