# Supplementary material for: Medicinal cannabis for symptom control in advanced cancer: a double-blind, placebo-controlled, randomised clinical trial of 1:1 tetrahydrocannabinol and cannabidiol
Source: Springer Nature journal article supplement (doi:10.1007/s00520-025-09763-5), 2025-07-24
Supplement: MOESM9 [file 520_2025_9763_MOESM9_ESM.pdf]

Placebo THC/CBD

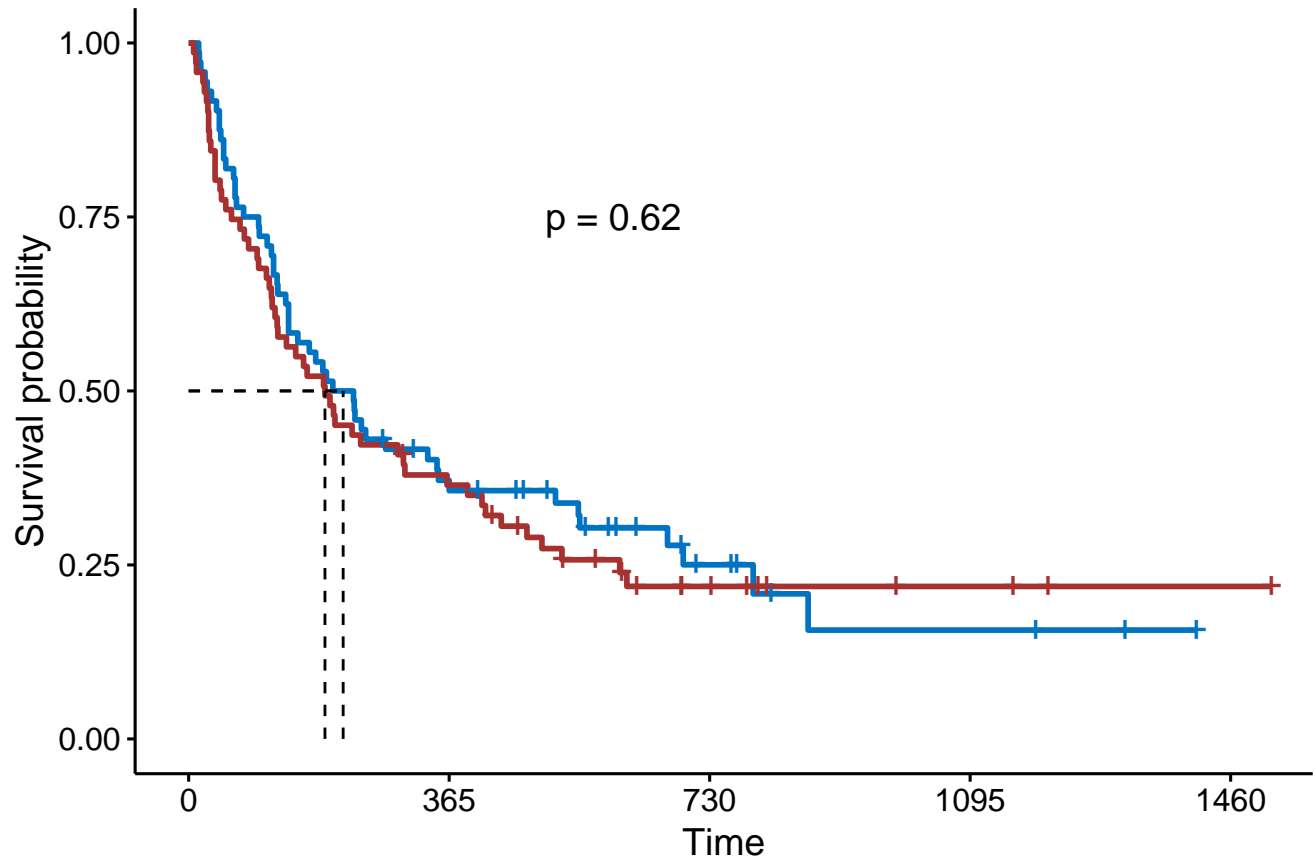

Number at risk

|         | 0  | 365 | 730 | 1095 | 1460 |
|---------|----|-----|-----|------|------|
| Placebo | 72 | 25  | 8   | 3    | 0    |
| THC/CBD | 71 | 25  | 8   | 3    | 1    |

Time
